# Supplementary material for: Improved electrochemical performance of defect-induced supercapacitor electrodes based on MnS-incorporated MnO2 nanorods
Source: Royal Society of Chemistry journal article supplement (doi:10.1039/d4na00085d), 2024-01-01
Supplement: d4na00085d1.pdf [file d4na00085d1.pdf]

## **Improved electrochemical performance of defect induced supercapacitor electrodes based on MnS incorporated MnO<sub>2</sub> nanorod**

Mizanur Rahaman<sup>1</sup>, Md. Roxy Islam<sup>2</sup>, Muhammad Rakibul Islam<sup>1\*</sup>

<sup>1</sup>Department of Physics, Bangladesh University of Engineering and Technology, Dhaka, Bangladesh

<sup>2</sup>Department of Materials and Metallurgical Engineering, Bangladesh University of Engineering and Technology, Dhaka, Bangladesh

\*Corresponding Author: [rakibul@phy.but.ac.bd](mailto:rakibul@phy.but.ac.bd)

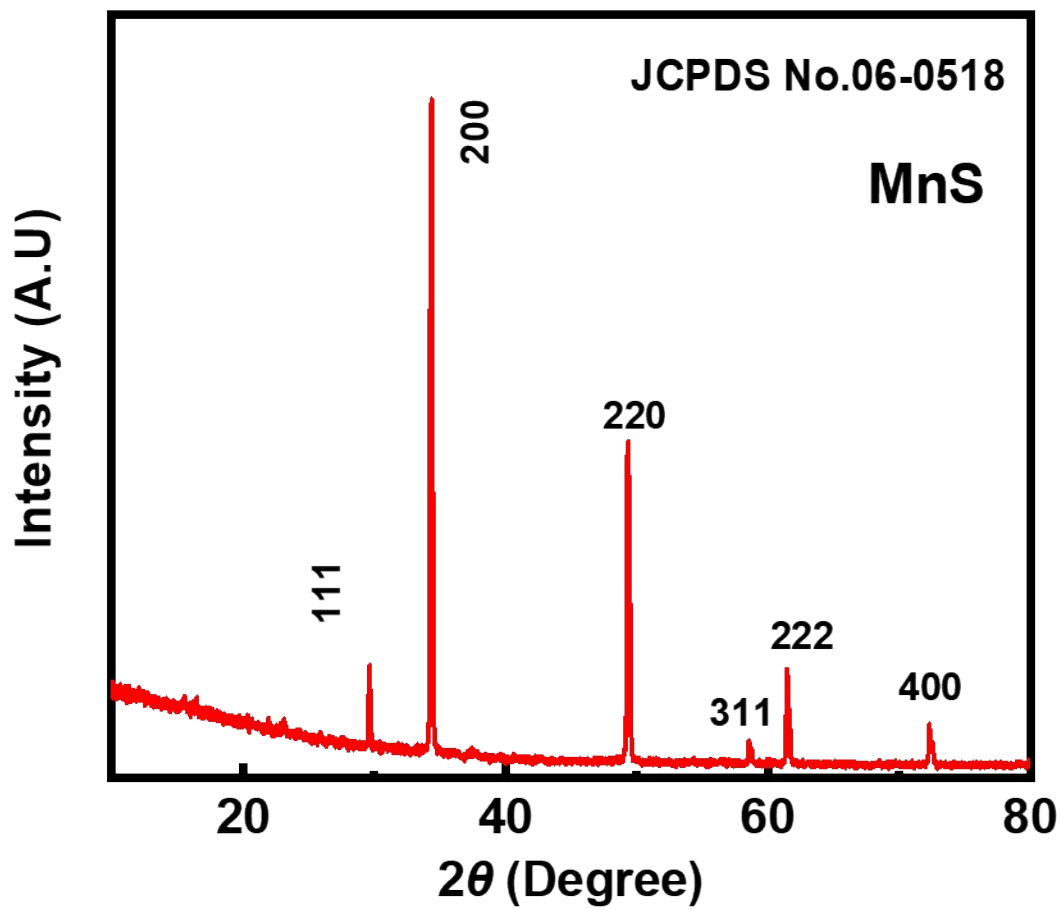

Fig. ST 1. X-ray diffraction pattern of MnS nanoparticles

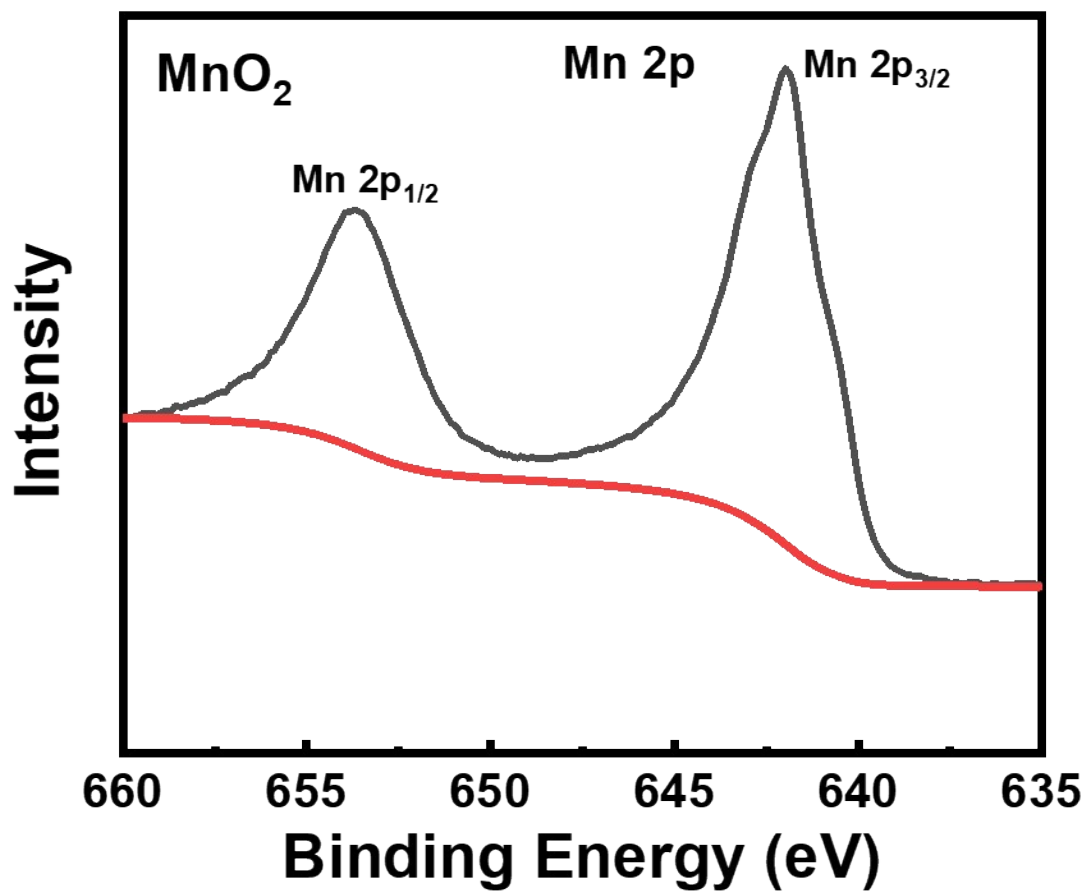

Fig. ST 2. High resolution Mn 2p spectra of MnO<sub>2</sub> nanorods

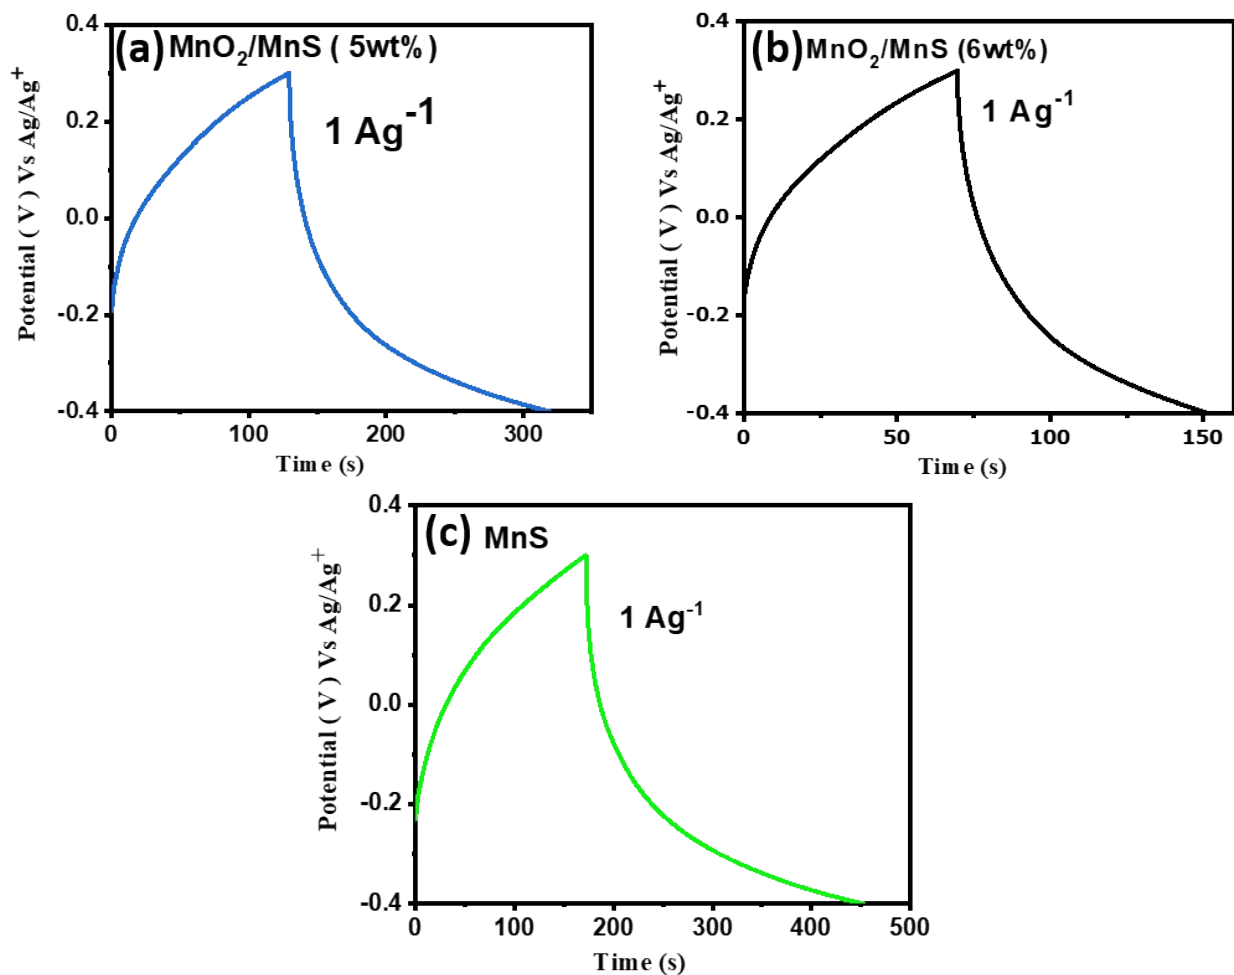

**Fig. ST 3.** GCD curve of (a) MnO<sub>2</sub>/MnS (5wt%), (b) MnO<sub>2</sub>/MnS (6wt%) and (c) MnS at three electrode system.

The capacitive performance of MnO<sub>2</sub>/MnS (5wt%), MnO<sub>2</sub>/MnS (6wt%) and MnS are measured in three electrode system by using the formula,

$$C_s = \frac{I \times \Delta t}{\Delta V \times m}$$

The specific capacitance of MnO<sub>2</sub>/MnS (5wt%, 6wt%) and MnS is 268 Fg<sup>-1</sup>, 114Fg<sup>-1</sup> and 397 Fg<sup>-1</sup>.

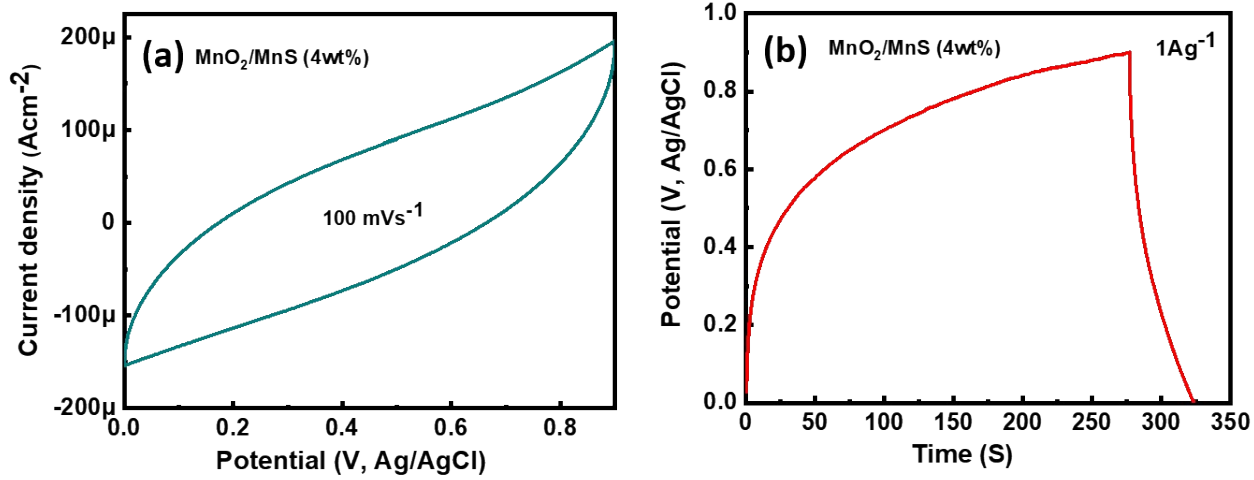

**Fig. ST 4.** (a) Cyclic voltammetry curve and (b) Galvanostatic charging-discharging curve of MnO<sub>2</sub>/MnS (4wt%) nanocomposite at two electrode system.

The specific capacitance, energy density and power density of two electrode symmetric system by using the formula,

$$C_s = \frac{4I \times \Delta t}{\Delta V \times m}$$

$$E_s = \frac{Cs(\Delta v)2 \times 1000}{8 \times 3600}$$

$$P_s = \frac{E_s \times 3600}{\Delta T}$$
